# Supplementary material for: Ensemble-based prediction of RNA secondary structures
Source: PubMed Central journal article supplement (PMC3750279; doi:10.1186/1471-2105-14-139), 2013-04-24
Supplement: 1471-2105-14-139-S1.pdf [file 1471-2105-14-139-S1.pdf]

# Ensemble-based Prediction of RNA Secondary Structures: Supporting Information

Nima Aghaeepour and Holger H. Hoos

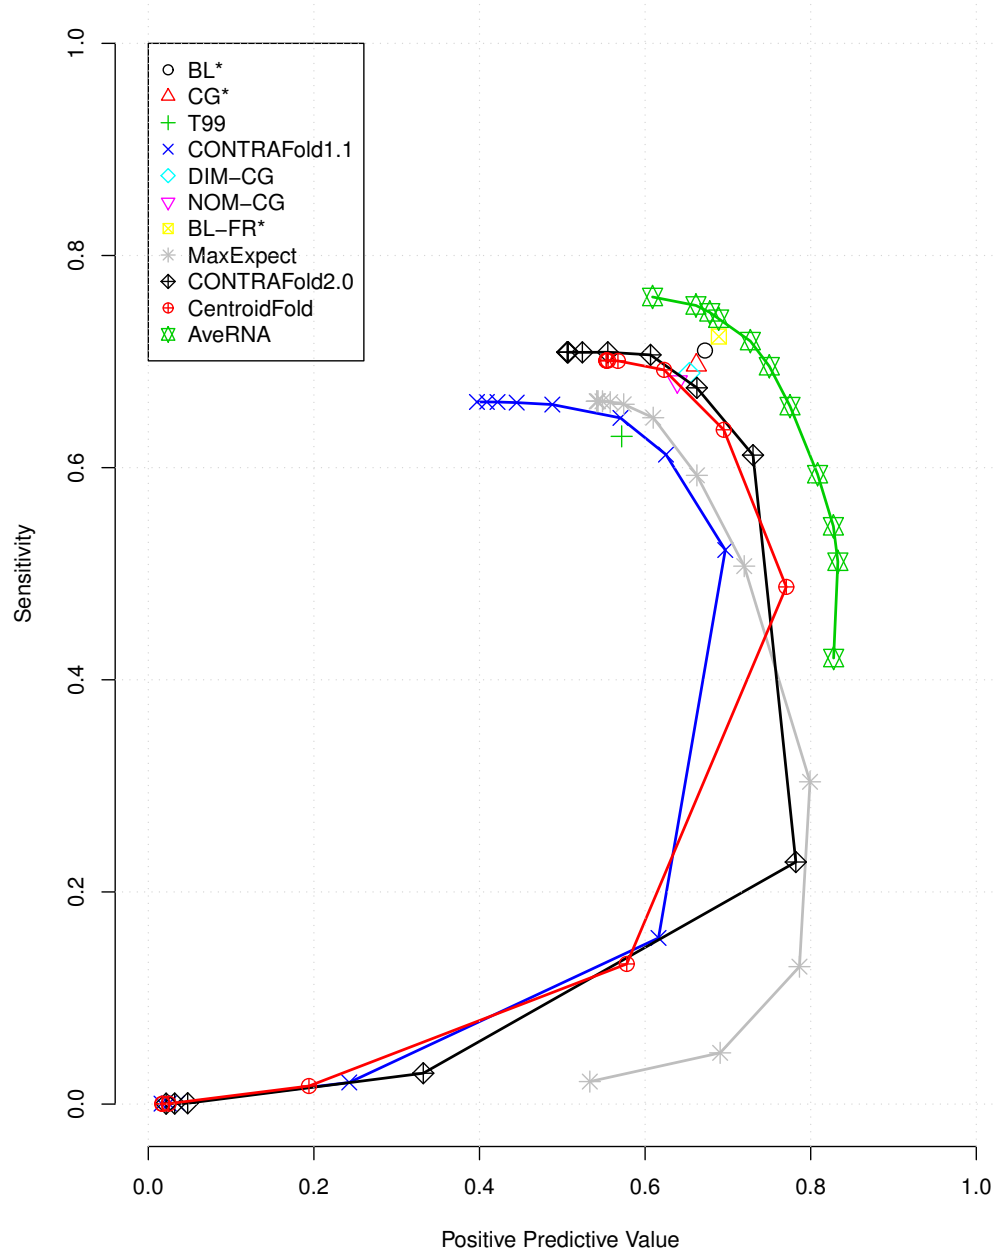

Figure S1: Same data as shown in Figure 2 of the manuscript, but with wider sensitivity and PPV ranges.

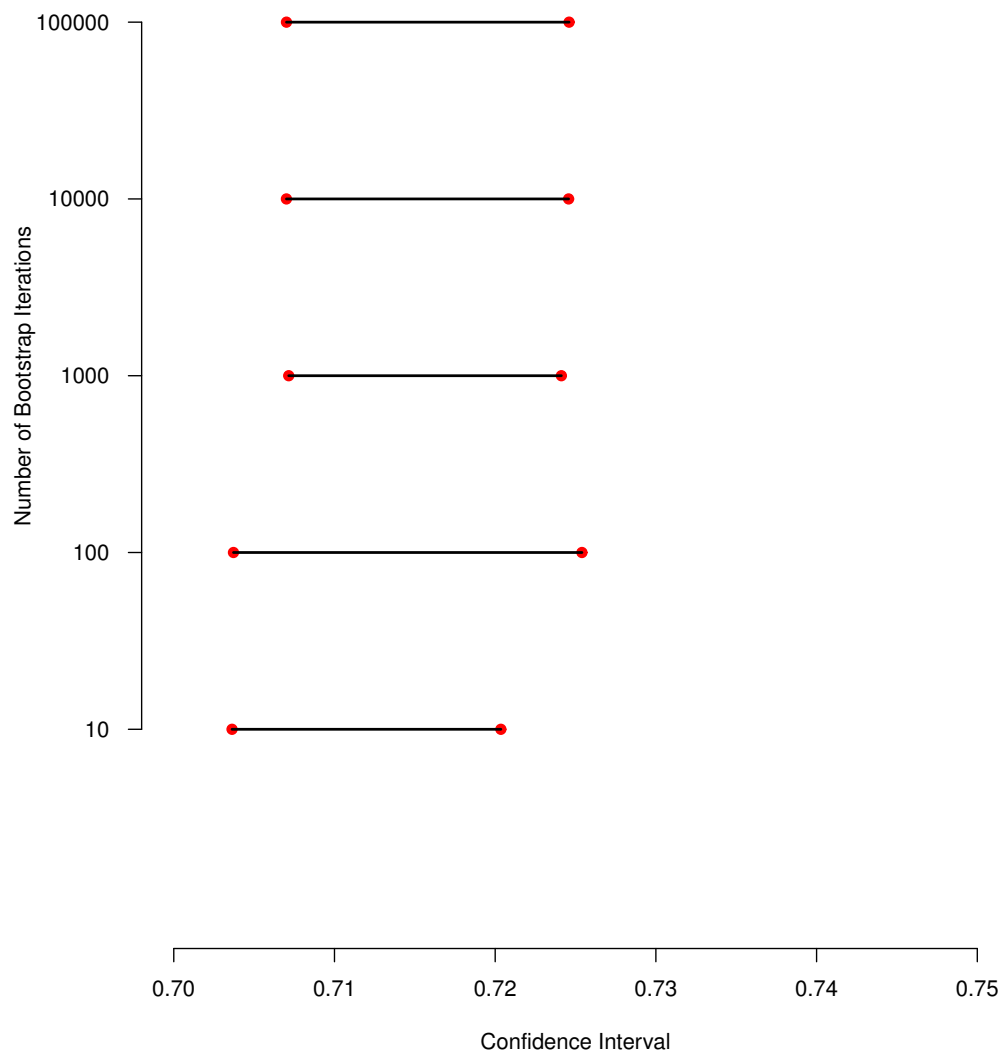

Figure S2: The confidence intervals for AveRNA's mean F-measure on S-STRAND2 for different numbers of bootstrap samples.

|               | ASE    | CRW    | PDB    | RFA    | SPR    | SRP    | TMR    |
|---------------|--------|--------|--------|--------|--------|--------|--------|
| AveRNA-I      | 0      | 0.4155 | 0.0390 | 0.0815 | 0.0255 | 0.0145 | 0.2679 |
| AveRNA-E      | 0.0597 | 0.1937 | 0.3987 | 0.4395 | 0.4689 | 0      | 0      |
| Best in Class | 0.3428 | 0.0550 | 0.0112 | 0.0102 | 0.3451 | 0.3382 | 0.2598 |

Table S1: Permutation tests between AveRNA and a given algorithm on different components of S-STRAND2. For every class, two tests were performed to determine if AveRNA’s mean F-measure is larger and smaller than that of the given algorithm. The minimum of the two obtained p-values are reported. The best in class algorithm is the one with maximum F-measure for that class in S-STRAND2 excluding AveRNA.

|               | AveRNA | BL-FR* | BL*    | CG*    | DIM-CG | NOM-CG | CONTRAFold2.0 | CentroidFold | MaxExpect | CONTRAFold1.1 | T99    |
|---------------|--------|--------|--------|--------|--------|--------|---------------|--------------|-----------|---------------|--------|
| AveRNA        | 0.0000 |        |        |        |        |        |               |              |           |               |        |
| BL-FR*        | 0.0000 | 0.0000 |        |        |        |        |               |              |           |               |        |
| BL*           | 0.0000 | 0.0000 | 0.0001 |        |        |        |               |              |           |               |        |
| CG*           | 0.0000 | 0.0000 | 0.0000 | 0.0011 |        |        |               |              |           |               |        |
| DIM-CG        | 0.0000 | 0.0000 | 0.0000 | 0.0000 | 0.0000 |        |               |              |           |               |        |
| NOM-CG        | 0.0000 | 0.0000 | 0.0000 | 0.0000 | 0.0000 | 0.0110 |               |              |           |               |        |
| CONTRAFold2.0 | 0.0000 | 0.0000 | 0.0000 | 0.0000 | 0.0000 | 0.0000 | 0.0000        |              |           |               |        |
| CentroidFold  | 0.0000 | 0.0000 | 0.0000 | 0.0000 | 0.0000 | 0.0000 | 0.0000        | 0.0000       |           |               |        |
| MaxExpect     | 0.0000 | 0.0000 | 0.0000 | 0.0000 | 0.0000 | 0.0000 | 0.0000        | 0.0000       | 0.0000    |               |        |
| CONTRAFold1.1 | 0.0000 | 0.0000 | 0.0000 | 0.0000 | 0.0000 | 0.0000 | 0.0000        | 0.0000       | 0.0000    | 0.0000        |        |
| T99           | 0.0000 | 0.0000 | 0.0000 | 0.0000 | 0.0000 | 0.0000 | 0.0000        | 0.0000       | 0.0000    | 0.0000        | 0.0000 |

Table S2: P-values for permutation tests over every pair of algorithms in Test Set 2.
